# Supplementary material for: Changes in Neutrophil–Lymphocyte or Platelet–Lymphocyte Ratios and Their Associations with Clinical Outcomes in Idiopathic Pulmonary Fibrosis
Source: MDPI journal article supplement (doi:10.3390/jcm10071427), 2021-04-01
Supplement: s1 [file s1]

# **Supplementary Materials**

*for*

## **Changes in Neutrophil–Lymphocyte or Platelet–Lymphocyte Ratios and their Associations with Clinical Outcomes in Idiopathic Pulmonary Fibrosis**

Steven D. Nathan, Jayesh Mehta, John Stauffer, Elizabeth Morgenthien, Ming Yang,

Susan L. Limb and Sangeeta Bhorade

**Table S1.** Baseline demographic and clinical characteristics of patients included in ASCEND and CAPACITY (placebo and pirfenidone 2403 mg/day groups), by change from baseline to Month 12 in PLR.

|                                         | Placebo                    |                            |                            |                            | Pirfenidone 2403 mg/day    |                            |                            |                            |
|-----------------------------------------|----------------------------|----------------------------|----------------------------|----------------------------|----------------------------|----------------------------|----------------------------|----------------------------|
|                                         | Q1                         | Q2                         | Q3                         | Q4                         | Q1                         | Q2                         | Q3                         | Q4                         |
|                                         | ( <i>n</i> = 154)          | ( <i>n</i> = 153)          | ( <i>n</i> = 154)          | ( <i>n</i> = 153)          | ( <i>n</i> = 154)          |
| Male sex, <i>n</i> (%)                  | 119 (77.3)                 | 109 (71.2)                 | 126 (81.8)                 | 103 (67.3)                 | 115 (74.7)                 | 116 (75.3)                 | 111 (72.1)                 | 117 (76.0)                 |
| Age, yr, mean (SD)                      | 67.3 (7.3)                 | 65.6 (7.6)                 | 67.9 (7.4)                 | 67.8 (7.6)                 | 66.3 (8.2)                 | 67.7 (7.5)                 | 66.5 (7.5)                 | 68.3 (7.0)                 |
| Percent predicted FVC, mean (SD)        | 71.2 (13.1)                | 74.3 (13.7)                | 71.5 (13.3)                | 70.9 (13.9)                | 72.1 (12.7)                | 71.8 (12.8)                | 71.7 (13.9)                | 70.8 (13.2)                |
| Percent predicted DLco, mean (SD)       | 44.8 (9.7)                 | 47.1 (9.2)*                | 43.7 (9.1)                 | 46.9 (15.1)*               | 45.7 (9.4)                 | 45.2 (10.0)                | 46.4 (11.1)                | 45.0 (10.4)                |
| Haemoglobin count, g/l, median (Q1, Q3) | 142.0<br>(131.0,<br>150.0) | 142.0<br>(134.0,<br>152.0) | 142.0<br>(136.0,<br>151.0) | 141.0<br>(132.0,<br>150.0) | 141.0<br>(132.0,<br>151.0) | 142.0<br>(134.0,<br>150.0) | 145.0<br>(134.0,<br>152.0) | 142.0<br>(135.0,<br>149.0) |
| Haematocrit count, median (Q1, Q3)      | 0.43 (0.40,<br>0.45)       | 0.42 (0.40,<br>0.45)       | 0.43 (0.40,<br>0.46)       | 0.42 (0.39,<br>0.45)       | 0.42 (0.39,<br>0.45)       | 0.42 (0.40,<br>0.45)       | 0.43 (0.40,<br>0.45)       | 0.42 (0.40,<br>0.45)       |
| Platelet count, GI/l, median (Q1, Q3)   | 251.0<br>(217.0,<br>299.0) | 227.0<br>(189.0,<br>264.0) | 229.5<br>(196.0,<br>270.0) | 252.0<br>(213.0,<br>298.0) | 250.5<br>(211.0,<br>298.0) | 234.5<br>(197.0,<br>281.0) | 230.0<br>(204.0,<br>262.0) | 238.5<br>(201.0,<br>280.0) |

|                                               |                      |                     |                     |                     |                      |                     |                     |                     |
|-----------------------------------------------|----------------------|---------------------|---------------------|---------------------|----------------------|---------------------|---------------------|---------------------|
| White blood cell count, GI/l, median (Q1, Q3) | 7.7 (6.6, 9.2)       | 7.8 (6.8, 8.8)      | 8.2 (7.1, 9.6)      | 8.0 (7.1, 9.4)      | 7.9 (6.4, 9.2)       | 8.1 (7.0, 9.2)      | 7.8 (6.9, 9.3)      | 7.8 (6.6, 8.8)      |
| Neutrophil count, GI/l, median (Q1, Q3)       | 5.2 (4.3, 6.4)       | 4.7 (4.0, 5.6)      | 5.1 (4.2, 6.0)      | 5.0 (4.2, 6.2)      | 5.1 (3.9, 6.3)       | 4.9 (4.2, 6.0)      | 4.8 (3.8, 5.8)      | 4.8 (3.9, 6.0)      |
| Lymphocyte count, GI/l, median (Q1, Q3)       | 1.7 (1.4, 2.0)       | 2.1 (1.8, 2.7)      | 2.2 (1.8, 2.6)      | 2.2 (1.7, 2.7)      | 1.8 (1.4, 2.2)       | 2.2 (1.8, 2.6)      | 2.1 (1.8, 2.6)      | 2.0 (1.5, 2.5)      |
| Monocyte count, GI/l, median (Q1, Q3)         | 0.45 (0.35, 0.57)    | 0.45 (0.38, 0.55)   | 0.50 (0.39, 0.60)   | 0.49 (0.37, 0.59)   | 0.45 (0.38, 0.56)    | 0.48 (0.40, 0.58)   | 0.49 (0.38, 0.58)   | 0.47 (0.40, 0.56)   |
| Eosinophil count, GI/l, median (Q1, Q3)       | 0.21 (0.15, 0.34)    | 0.19 (0.12, 0.28)   | 0.24 (0.15, 0.36)   | 0.25 (0.16, 0.33)   | 0.20 (0.13, 0.29)    | 0.21 (0.13, 0.31)   | 0.25 (0.17, 0.36)   | 0.22 (0.14, 0.34)   |
| Basophil count, GI/l, median (Q1, Q3)         | 0.05 (0.03, 0.07)    | 0.05 (0.04, 0.06)   | 0.06 (0.04, 0.07)   | 0.05 (0.03, 0.07)   | 0.05 (0.03, 0.07)    | 0.05 (0.04, 0.07)   | 0.05 (0.04, 0.07)   | 0.05 (0.04, 0.06)   |
| NLR, median (Q1, Q3)                          | 3.1 (2.5, 4.0)       | 2.2 (1.7, 3.0)      | 2.3 (1.8, 3.0)      | 2.4 (1.7, 3.2)      | 2.8 (2.1, 3.9)       | 2.3 (1.7, 3.0)      | 2.2 (1.7, 2.8)      | 2.5 (1.7, 3.4)      |
| PLR, median (Q1, Q3)                          | 150.8 (129.7, 180.4) | 102.2 (84.4, 128.1) | 106.7 (83.2, 132.3) | 116.1 (95.9, 148.8) | 139.5 (112.1, 174.2) | 107.6 (89.1, 137.2) | 108.8 (86.0, 132.0) | 123.8 (94.2, 151.5) |

\* $n = 152$ .

DLco: diffusing capacity for carbon monoxide; FVC: forced vital capacity; GI:  $10^9$  cells; NLR: neutrophil–lymphocyte ratio; Q: quartile;

PLR: platelet–lymphocyte ratio; SD: standard deviation.

**Table S2.** Baseline demographic and clinical characteristics of patients included in ASCEND and CAPACITY (placebo and pirfenidone 2403 mg/day groups), by baseline NLR.

|                                               | Placebo              |                      |                      |                      | Pirfenidone 2403 mg/day |                      |                      |                      |
|-----------------------------------------------|----------------------|----------------------|----------------------|----------------------|-------------------------|----------------------|----------------------|----------------------|
|                                               | Q1                   | Q2                   | Q3                   | Q4                   | Q1                      | Q2                   | Q3                   | Q4                   |
|                                               | (n = 156)               | (n = 156)            | (n = 157)            | (n = 154)            |
| Male sex, n (%)                               | 102 (65.4)           | 117 (75.0)           | 116 (74.4)           | 130 (83.3)           | 107 (68.6)              | 110 (70.5)           | 119 (75.8)           | 127 (82.5)           |
| Age, yr, mean (SD)                            | 66.3 (7.6)           | 67.0 (7.6)           | 67.0 (7.6)           | 68.2 (7.3)           | 65.7 (7.9)              | 67.3 (7.5)           | 67.7 (7.7)           | 68.2 (6.9)           |
| Percent predicted FVC, mean (SD)              | 73.3 (14.0)          | 72.6 (14.4)          | 72.1 (12.8)          | 70.0 (13.1)          | 71.7 (12.4)             | 72.3 (13.2)          | 72.6 (13.9)          | 69.8 (13.1)          |
| Percent predicted DLco, mean (SD)             | 47.3 (10.3)          | 46.4 (13.7)*         | 45.1 (10.0)*         | 43.6 (9.7)           | 47.4 (10.6)             | 46.1 (9.7)           | 45.5 (10.9)          | 43.3 (9.1)           |
| Haemoglobin count, g/l, median (Q1, Q3)       | 140.5 (133.5, 151.0) | 142.0 (132.5, 149.5) | 142.0 (134.5, 151.0) | 142.5 (132.0, 152.0) | 142.0 (133.0, 150.0)    | 142.0 (133.0, 150.0) | 143.0 (135.0, 152.0) | 141.0 (133.0, 150.0) |
| Haematocrit count, median (Q1, Q3)            | 0.42 (0.40, 0.46)    | 0.42 (0.40, 0.45)    | 0.42 (0.40, 0.45)    | 0.42 (0.39, 0.45)    | 0.42 (0.40, 0.45)       | 0.42 (0.39, 0.45)    | 0.43 (0.40, 0.45)    | 0.43 (0.40, 0.45)    |
| Platelet count, GI/l, median (Q1, Q3)         | 232.0 (196.0, 276.0) | 243.0 (212.0, 297.0) | 247.0 (201.5, 287.5) | 238.5 (202.5, 284.0) | 234.5 (202.5, 264.5)    | 241.0 (197.0, 283.0) | 235.0 (204.0, 282.0) | 243.0 (206.0, 290.0) |
| White blood cell count, GI/l, median (Q1, Q3) | 7.4 (6.2, 8.5)       | 7.7 (6.8, 8.9)       | 7.9 (7.1, 9.0)       | 8.8 (7.6, 10.2)      | 7.5 (6.1, 8.5)          | 7.5 (6.5, 8.8)       | 8.1 (6.9, 9.1)       | 8.6 (7.3, 10.0)      |

|                                            |                                    |                                     |                         |                                      |                                    |                                     |                                      |                         |
|--------------------------------------------|------------------------------------|-------------------------------------|-------------------------|--------------------------------------|------------------------------------|-------------------------------------|--------------------------------------|-------------------------|
| Neutrophil count, GI/l,<br>median (Q1, Q3) | 4.0 (3.3, 4.5)                     | 4.8 (4.2, 5.5)                      | 5.3 (4.8, 6.0)          | 6.3 (5.4, 7.6)                       | 3.9 (3.1, 4.6)                     | 4.5 (3.8, 5.2)                      | 5.3 (4.6, 6.1)                       | 6.2 (5.2, 7.4)          |
| Lymphocyte count,<br>GI/l, median (Q1, Q3) | 2.6 (2.2, 3.1)                     | 2.2 (1.9, 2.5)                      | 1.8 (1.6, 2.2)          | 1.5 (1.2, 1.8)                       | 2.8 (2.2, 3.2)                     | 2.1 (1.8, 2.5)                      | 1.9 (1.6, 2.2)                       | 1.5 (1.2, 1.8)          |
| Monocyte count, GI/l,<br>median (Q1, Q3)   | 0.46 (0.36,<br>0.57)               | 0.47 (0.38,<br>0.56)                | 0.46 (0.35,<br>0.57)    | 0.49 (0.39,<br>0.62)                 | 0.45 (0.37,<br>0.55)               | 0.48 (0.40,<br>0.58)                | 0.48 (0.39,<br>0.57)                 | 0.51 (0.39,<br>0.62)    |
| Eosinophil count, GI/l,<br>median (Q1, Q3) | 0.23 (0.15,<br>0.33)               | 0.20 (0.13,<br>0.30)                | 0.24 (0.15,<br>0.35)    | 0.21 (0.13,<br>0.33)                 | 0.22 (0.13,<br>0.32)               | 0.24 (0.16,<br>0.36)                | 0.21 (0.14,<br>0.31)                 | 0.21 (0.12,<br>0.33)    |
| Basophil count, GI/l,<br>median (Q1, Q3)   | 0.05 (0.03,<br>0.07)               | 0.05 (0.04,<br>0.07)                | 0.05 (0.04,<br>0.07)    | 0.05 (0.03,<br>0.06)                 | 0.05 (0.03,<br>0.06)               | 0.05 (0.04,<br>0.08)                | 0.05 (0.04,<br>0.07)                 | 0.05 (0.04,<br>0.07)    |
| NLR, median (Q1, Q3)                       | 1.5 (1.3, 1.7)                     | 2.2 (2.0, 2.4)                      | 2.9 (2.7, 3.1)          | 4.1 (3.6, 4.9)                       | 1.5 (1.2, 1.6)                     | 2.1 (2.0, 2.3)                      | 2.8 (2.6, 3.0)                       | 4.0 (3.6, 4.8)          |
| PLR, median (Q1, Q3)                       | 90.8 (71.2,<br>107.7) <sup>†</sup> | 110.1 (93.3,<br>135.8) <sup>*</sup> | 130.9 (106.5,<br>153.7) | 162.8 (133.3,<br>195.0) <sup>‡</sup> | 88.0 (70.9,<br>103.9) <sup>*</sup> | 113.7 (92.9,<br>131.9) <sup>*</sup> | 126.1 (107.8,<br>145.6) <sup>§</sup> | 164.9 (136.1,<br>202.7) |

<sup>\*</sup>*n* = 155.

<sup>†</sup>*n* = 154.

<sup>‡</sup>*n* = 153.

<sup>§</sup>*n* = 156.

DLco: diffusing capacity for carbon monoxide; FVC: forced vital capacity; GI: 10<sup>9</sup> cells; NLR: neutrophil–lymphocyte ratio; Q: quartile;

PLR: platelet–lymphocyte ratio; SD: standard deviation.

**Table S3.** Baseline demographic and clinical characteristics of patients included in ASCEND and CAPACITY (placebo and pirfenidone 2403 mg/day groups), by baseline PLR.

|                                         | Placebo                    |                            |                            |                            | Pirfenidone 2403 mg/day    |                            |                            |                            |
|-----------------------------------------|----------------------------|----------------------------|----------------------------|----------------------------|----------------------------|----------------------------|----------------------------|----------------------------|
|                                         | Q1                         | Q2                         | Q3                         | Q4                         | Q1                         | Q2                         | Q3                         | Q4                         |
|                                         | (n = 155)                  | (n = 154)                  | (n = 155)                  | (n = 154)                  | (n = 155)                  | (n = 155)                  | (n = 155)                  | (n = 155)                  |
| Male sex, <i>n</i> (%)                  | 121 (78.1)                 | 110 (71.4)                 | 117 (75.5)                 | 113 (73.4)                 | 121 (78.1)                 | 119 (76.8)                 | 109 (70.3)                 | 112 (72.3)                 |
| Age, yr, mean (SD)                      | 66.5 (8.1)                 | 67.2 (7.3)                 | 67.4 (7.5)                 | 67.7 (7.3)                 | 67.1 (8.0)                 | 66.2 (7.5)                 | 67.9 (7.1)                 | 67.6 (7.6)                 |
| Percent predicted FVC, mean (SD)        | 71.8 (13.3)                | 74.6 (14.0)                | 70.9 (13.8)                | 70.6 (12.8)                | 70.4 (11.4)                | 72.0 (13.3)                | 73.7 (14.4)                | 70.0 (13.0)                |
| Percent predicted DLco, mean (SD)       | 45.7 (9.7)                 | 46.7 (10.2)                | 45.0 (14.0)*               | 45.0 (10.1) <sup>†</sup>   | 44.3 (9.5)                 | 46.6 (11.0)                | 46.4 (10.1)                | 44.9 (10.0)                |
| Haemoglobin count, g/l, median (Q1, Q3) | 144.0<br>(135.0,<br>153.0) | 141.0<br>(136.0,<br>149.0) | 140.0<br>(132.0,<br>151.0) | 141.5<br>(129.0,<br>149.0) | 145.0<br>(137.0,<br>152.0) | 143.0<br>(133.0,<br>153.0) | 142.0<br>(133.0,<br>150.0) | 140.0<br>(131.0,<br>147.0) |
| Haematocrit count, median (Q1, Q3)      | 0.43 (0.41,<br>0.47)       | 0.42 (0.40,<br>0.45)       | 0.42 (0.40,<br>0.45)       | 0.42 (0.39,<br>0.45)       | 0.43 (0.40,<br>0.45)       | 0.43 (0.40,<br>0.46)       | 0.43 (0.40,<br>0.45)       | 0.42 (0.39,<br>0.44)       |
| Platelet count, GI/l, median (Q1, Q3)   | 197.0<br>(176.0,<br>239.0) | 235.0<br>(205.0,<br>266.0) | 252.0<br>(221.0,<br>296.0) | 275.5<br>(239.0,<br>322.0) | 206.0<br>(178.0,<br>246.0) | 229.0<br>(200.0,<br>258.0) | 248.0<br>(213.0,<br>288.0) | 281.0<br>(241.0,<br>330.0) |

|                                               |                   |                      |                      |                      |                   |                      |                      |                      |
|-----------------------------------------------|-------------------|----------------------|----------------------|----------------------|-------------------|----------------------|----------------------|----------------------|
| White blood cell count, GI/l, median (Q1, Q3) | 8.3 (7.1, 9.6)    | 7.8 (7.0, 9.0)       | 7.8 (6.9, 9.2)       | 7.8 (6.5, 8.9)       | 8.3 (7.3, 9.7)    | 7.9 (6.6, 9.1)       | 7.6 (6.4, 8.8)       | 7.8 (6.5, 8.9)       |
| Neutrophil count, GI/l, median (Q1, Q3)       | 4.8 (4.0, 5.8)    | 4.8 (4.1, 5.8)       | 5.2 (4.4, 6.1)       | 5.3 (4.3, 6.3)       | 4.7 (3.7, 5.8)    | 4.8 (3.9, 5.9)       | 5.0 (4.0, 6.0)       | 5.2 (4.3, 6.4)       |
| Lymphocyte count, GI/l, median (Q1, Q3)       | 2.7 (2.3, 3.1)    | 2.2 (1.9, 2.5)       | 1.9 (1.7, 2.1)       | 1.5 (1.3, 1.7)       | 2.9 (2.2, 3.2)    | 2.1 (1.9, 2.4)       | 1.9 (1.6, 2.2)       | 1.5 (1.2, 1.8)       |
| Monocyte count, GI/l, median (Q1, Q3)         | 0.51 (0.40, 0.61) | 0.46 (0.36, 0.56)    | 0.46 (0.36, 0.57)    | 0.45 (0.35, 0.55)    | 0.48 (0.40, 0.58) | 0.47 (0.38, 0.57)    | 0.47 (0.37, 0.57)    | 0.48 (0.39, 0.58)    |
| Eosinophil count, GI/l, median (Q1, Q3)       | 0.22 (0.13, 0.31) | 0.21 (0.13, 0.31)    | 0.21 (0.15, 0.35)    | 0.22 (0.16, 0.34)    | 0.24 (0.14, 0.34) | 0.21 (0.14, 0.36)    | 0.21 (0.13, 0.30)    | 0.22 (0.14, 0.36)    |
| Basophil count, GI/l, median (Q1, Q3)         | 0.06 (0.04, 0.08) | 0.05 (0.04, 0.07)    | 0.05 (0.04, 0.07)    | 0.05 (0.03, 0.06)    | 0.05 (0.03, 0.07) | 0.05 (0.04, 0.07)    | 0.05 (0.04, 0.07)    | 0.05 (0.04, 0.07)    |
| NLR, median (Q1, Q3)                          | 1.7 (1.4, 2.3)    | 2.2 (1.8, 2.8)       | 2.8 (2.2, 3.3)       | 3.5 (2.9, 4.6)       | 1.7 (1.3, 2.2)    | 2.2 (1.7, 2.7)       | 2.6 (2.2, 3.3)       | 3.6 (2.8, 4.5)       |
| PLR, median (Q1, Q3)                          | 79.2 (66.6, 86.8) | 105.2 (100.8, 111.9) | 136.9 (128.1, 144.2) | 180.3 (166.3, 212.9) | 78.7 (69.0, 86.6) | 105.3 (100.0, 113.6) | 131.9 (125.6, 140.1) | 181.9 (161.6, 208.6) |

\* $n = 154$ .

† $n = 153$ .

DLco: diffusing capacity for carbon monoxide; FVC: forced vital capacity; GI:  $10^9$  cells; NLR: neutrophil–lymphocyte ratio; Q: quartile;  
PLR: platelet–lymphocyte ratio; SD: standard deviation.



**Table S4.** *P* values for Month 12 endpoints based on quartiles as defined by baseline NLR, baseline PLR and NLR or PLR changes from baseline to Month 12 in patients with IPF.

|                                                                      | Baseline NLR* |                            | Baseline PLR* |                            | NLR or PLR Changes from Baseline to 12 Months* |                            |
|----------------------------------------------------------------------|---------------|----------------------------|---------------|----------------------------|------------------------------------------------|----------------------------|
|                                                                      |               |                            |               |                            | NLR Changes,                                   | PLR Changes,               |
|                                                                      | Placebo Group | Pirfenidone<br>2403 mg/day | Placebo Group | Pirfenidone<br>2403 mg/day | Pirfenidone<br>2403 mg/day                     | Pirfenidone<br>2403 mg/day |
| All-cause mortality                                                  | 0.03          | 0.18                       | 0.83          | 0.92                       | 0.28                                           | 0.69                       |
| Absolute decline in<br>percent predicted<br>FVC $\geq 10\%$ or death | 0.08          | 0.005                      | 0.37          | 0.29                       | 0.04                                           | 0.61                       |
| Absolute decline in<br>6MWD $\geq 50$ m or<br>death                  | 0.01          | 0.001                      | 0.04          | 0.36                       | 0.38                                           | 0.40                       |
| Worsening in<br>UCSD-SOBQ score<br>$\geq 20$ points or death         | 0.42          | 0.02                       | 0.64          | 0.87                       | 0.47                                           | 0.58                       |
| Any respiratory<br>hospitalisation                                   | 0.25          | 0.77                       | 0.58          | 0.19                       | <0.001                                         | 0.07                       |

|                                                                                      |      |      |      |      |       |      |
|--------------------------------------------------------------------------------------|------|------|------|------|-------|------|
| Any respiratory<br>hospitalisation or<br>death                                       | 0.15 | 0.95 | 0.75 | 0.33 | 0.001 | 0.10 |
| Absolute decline in<br>percent predicted<br>DLco $\geq$ 15% or<br>death <sup>†</sup> | 0.32 | 0.49 | 0.77 | 0.16 | 0.26  | 0.43 |

\*Data analysed by Cochran–Armitage test for linear trend, which used quartile integers (1, 2, 3 and 4) as scores.

<sup>†</sup>Post-baseline percent predicted DLco was only measured in CAPACITY. Quartiles were not redefined for this subset.

6MWD: 6-minute walk distance; DLco: diffusing capacity for carbon monoxide; FVC: forced vital capacity; IPF: idiopathic pulmonary fibrosis;

NLR: neutrophil–lymphocyte ratio; PLR: platelet–lymphocyte ratio; UCSD-SOBQ: University of California San Diego Shortness of Breath

Questionnaire.

**Table S5.** Month 12 endpoints based on quartiles as defined by PLR changes from baseline to Month 12 in patients with IPF (pooled from the placebo groups of ASCEND and CAPACITY).

|                                                                                         | <b>Q1 (n = 154)</b>     | <b>Q2 (n = 153)</b>   | <b>Q3 (n = 154)</b>   | <b>Q4 (n = 153)</b>     | <b>Cochran–<br/>Armitage<br/>P Value*</b> |
|-----------------------------------------------------------------------------------------|-------------------------|-----------------------|-----------------------|-------------------------|-------------------------------------------|
| PLR changes from baseline <sup>†</sup> to Month 12, <sup>‡</sup><br>median (Q1, Q3)     | –35.7<br>(–48.0, –24.4) | –6.1<br>(–10.9, –1.7) | 12.2<br>(7.6, 18.0)   | 49.0<br>(37.1, 70.5)    | –                                         |
| Platelets percent change from baseline to<br>Month 12, median (Q1, Q3)                  | –4.6<br>(–16.4, 3.2)    | –2.8<br>(–10.3, 6.4)  | 4.2<br>(–4.3, 15.1)   | 10.1<br>(–1.9, 22.1)    | –                                         |
| Lymphocytes percent change from baseline<br>to Month 12, median (Q1, Q3)                | 27.3<br>(9.7, 43.4)     | 3.7<br>(–6.1, 13.8)   | –7.9<br>(–14.2, 3.5)  | –22.9<br>(–35.6, –15.1) | –                                         |
| Absolute decline in percent predicted FVC<br>from baseline to Month 12, median (Q1, Q3) | –4.4<br>(–9.7, –0.9)    | –3.9<br>(–8.2, –0.7)  | –5.0<br>(–11.2, –1.5) | –7.6<br>(–13.8, –3.8)   | –                                         |
| All-cause mortality, n (%)                                                              | 6 (3.9)                 | 7 (4.6)               | 11 (7.1)              | 16 (10.5)               | 0.01                                      |
| Absolute decline in percent predicted<br>FVC ≥10% or death, n (%)                       | 32 (20.8)               | 23 (15.0)             | 46 (29.9)             | 60 (39.2)               | <0.001                                    |
| Absolute decline in 6MWD ≥50 m or death,<br>n (%)                                       | 50 (32.5)               | 39 (25.5)             | 54 (35.1)             | 66 (43.1)               | 0.02                                      |
| Worsening in UCSD-SOBQ score ≥20 points<br>or death, n (%)                              | 42 (27.3)               | 33 (21.6)             | 45 (29.2)             | 71 (46.4)               | <0.001                                    |

|                                                                                        |                         |                      |                        |                         |        |
|----------------------------------------------------------------------------------------|-------------------------|----------------------|------------------------|-------------------------|--------|
| Any respiratory hospitalisation, <i>n</i> (%)                                          | 12 (7.8)                | 14 (9.2)             | 16 (10.4)              | 30 (19.6)               | 0.002  |
| Any respiratory hospitalisation or death,<br><i>n</i> (%)                              | 13 (8.4)                | 14 (9.2)             | 18 (11.7)              | 35 (22.9)               | <0.001 |
| Absolute decline in percent predicted DLco<br>≥15% or death, <sup>§</sup> <i>n</i> (%) | 11 (12.0) <sup>  </sup> | 6 (5.9) <sup>¶</sup> | 9 (10.8) <sup>**</sup> | 17 (27.0) <sup>††</sup> | 0.009  |

\*The Cochran–Armitage test for linear trend used quartile integers (1, 2, 3 and 4) as scores. Sensitivity analyses using median changes as scores for the quartiles did not result in meaningful differences.

<sup>†</sup>Baseline assessments are defined as the last value obtained prior to first dose.

<sup>‡</sup>For patients who died or discontinued prior to Month 12, the last available post-baseline value was used.

<sup>§</sup>Post-baseline percent predicted DLco was only measured in CAPACITY. Quartiles were not redefined for this subset.

<sup>||</sup>*n* = 92.

<sup>¶</sup>*n* = 102.

<sup>\*\*</sup>*n* = 83.

<sup>††</sup>*n* = 63.

6MWD: 6-minute walk distance; DLco: diffusing capacity for carbon monoxide; FVC: forced vital capacity; IPF: idiopathic pulmonary fibrosis;

PLR: platelet–lymphocyte ratio; Q: quartile; UCSD-SOBQ: University of California San Diego Shortness of Breath Questionnaire.
